# Supplementary material for: Association between social support and place of delivery: a cross-sectional study in Kericho, Western Kenya
Source: PubMed Central journal article supplement (PMC4222494; doi:10.1186/1471-2393-13-214), 2013-11-21
Supplement: 1471-2393-13-214-S2.pdf [file 1471-2393-13-214-S2.pdf]

Questionnaire 2 (Birth experience)

|    |                                                                                                                                                                                                         |                           |                                      |
|----|---------------------------------------------------------------------------------------------------------------------------------------------------------------------------------------------------------|---------------------------|--------------------------------------|
| Q1 | Where did you give birth to your last child?                                                                                                                                                            | HEALTH FACILITY           |                                      |
|    |                                                                                                                                                                                                         | 1                         | Health Center                        |
|    |                                                                                                                                                                                                         | 2                         | Dispensary                           |
|    |                                                                                                                                                                                                         | 3                         | Sub-District Hospital                |
|    |                                                                                                                                                                                                         | 4                         | District Hospital                    |
|    |                                                                                                                                                                                                         | 5                         | Private Hospital/Clinic              |
|    |                                                                                                                                                                                                         | NOT HEALTH FACILITY       |                                      |
|    |                                                                                                                                                                                                         | 6                         | Home                                 |
|    |                                                                                                                                                                                                         | 8                         | Others/Specify ( )                   |
| Q2 | If you chose 6 (gave birth at home) in Q1, answer the following question.<br>Who was the main person to assist you during your last child birth?<br>*The person who handled the baby after it came out. | 1                         | Traditional birth attendant          |
|    |                                                                                                                                                                                                         | 2                         | Mother-in-law                        |
|    |                                                                                                                                                                                                         | 3                         | Mother                               |
|    |                                                                                                                                                                                                         | 4                         | Sister-in-law                        |
|    |                                                                                                                                                                                                         | 5                         | Sister                               |
|    |                                                                                                                                                                                                         | 6                         | Female relative<br>Specify ( )       |
|    |                                                                                                                                                                                                         | 7                         | My child                             |
|    |                                                                                                                                                                                                         | 8                         | Friend                               |
|    |                                                                                                                                                                                                         | 9                         | Neighbor                             |
|    |                                                                                                                                                                                                         | 10                        | Others/Specify ( )                   |
| Q3 | Have you ever delivered before this baby?                                                                                                                                                               | Yes                       | No                                   |
| Q4 | How long does it take from your home to the nearest delivery facility?                                                                                                                                  | 1                         | ( ) minutes by foot                  |
|    |                                                                                                                                                                                                         | 2                         | ( ) minutes by bike                  |
|    |                                                                                                                                                                                                         | 3                         | ( ) minutes by matatu                |
|    |                                                                                                                                                                                                         | 4                         | ( ) minutes by taxi or private car   |
|    |                                                                                                                                                                                                         | 5                         | ( ) minutes by<br>Others/Specify ( ) |
|    |                                                                                                                                                                                                         | *Calculate total minutes. |                                      |
