# Supplementary material for: Association between social support and place of delivery: a cross-sectional study in Kericho, Western Kenya
Source: PubMed Central journal article supplement (PMC4222494; doi:10.1186/1471-2393-13-214), 2013-11-21
Supplement: 1471-2393-13-214-S3.pdf [file 1471-2393-13-214-S3.pdf]

Questionnaire 3 (Social support)

|    |                                                                                                                                                                                                 |    |                         |
|----|-------------------------------------------------------------------------------------------------------------------------------------------------------------------------------------------------|----|-------------------------|
| Q1 | When you were unwell during pregnancy or when you needed to go for medical care including Antenatal care (ANC), were there people who helped you in fetching water?                             | 1  | Husband                 |
|    |                                                                                                                                                                                                 | 2  | Mother-in-law           |
|    |                                                                                                                                                                                                 | 3  | Mother                  |
|    |                                                                                                                                                                                                 | 4  | Father-in-law           |
|    |                                                                                                                                                                                                 | 5  | Father                  |
|    |                                                                                                                                                                                                 | 6  | Sister-in-law           |
|    |                                                                                                                                                                                                 | 7  | Sister                  |
|    |                                                                                                                                                                                                 | 8  | Brother in law          |
|    |                                                                                                                                                                                                 | 9  | Brother                 |
|    |                                                                                                                                                                                                 | 10 | Female relative         |
|    |                                                                                                                                                                                                 | 11 | Children                |
|    |                                                                                                                                                                                                 | 12 | Friends                 |
|    |                                                                                                                                                                                                 | 13 | Neighbors               |
|    |                                                                                                                                                                                                 | 14 | House girl or house boy |
|    |                                                                                                                                                                                                 | 15 | Co-wife                 |
|    |                                                                                                                                                                                                 | 16 | Others/specify ( )      |
|    |                                                                                                                                                                                                 | 17 | Nobody                  |
| Q2 | When you were unwell during pregnancy or when you needed to go for medical care including Antenatal care (ANC), were there people who helped you in household chore (excluding fetching water)? | 1  | Husband                 |
|    |                                                                                                                                                                                                 | 2  | Mother-in-law           |
|    |                                                                                                                                                                                                 | 3  | Mother                  |
|    |                                                                                                                                                                                                 | 4  | Father-in-law           |
|    |                                                                                                                                                                                                 | 5  | Father                  |
|    |                                                                                                                                                                                                 | 6  | Sister-in-law           |
|    |                                                                                                                                                                                                 | 7  | Sister                  |
|    |                                                                                                                                                                                                 | 8  | Brother in law          |
|    |                                                                                                                                                                                                 | 9  | Brother                 |
|    |                                                                                                                                                                                                 | 10 | Female relative         |
|    |                                                                                                                                                                                                 | 11 | Children                |
|    |                                                                                                                                                                                                 | 12 | Friends                 |
|    |                                                                                                                                                                                                 | 13 | Neighbors               |
|    |                                                                                                                                                                                                 | 14 | House girl or house boy |
|    |                                                                                                                                                                                                 | 15 | Co-wife                 |
|    |                                                                                                                                                                                                 | 16 | Others/specify ( )      |
|    |                                                                                                                                                                                                 | 17 | Nobody                  |

|    |                                                                                                                                                              |     |                         |
|----|--------------------------------------------------------------------------------------------------------------------------------------------------------------|-----|-------------------------|
| Q3 | When you were unwell during pregnancy or when you needed to go for medical care including Antenatal care (ANC), were there people who helped you in farming? | 1   | Husband                 |
|    |                                                                                                                                                              | 2   | Mother-in-law           |
|    |                                                                                                                                                              | 3   | Mother                  |
|    |                                                                                                                                                              | 4   | Father-in-law           |
|    |                                                                                                                                                              | 5   | Father                  |
|    |                                                                                                                                                              | 6   | Sister-in-law           |
|    |                                                                                                                                                              | 7   | Sister                  |
|    |                                                                                                                                                              | 8   | Brother in law          |
|    |                                                                                                                                                              | 9   | Brother                 |
|    |                                                                                                                                                              | 10  | Female relative         |
|    |                                                                                                                                                              | 11  | Children                |
|    |                                                                                                                                                              | 12  | Friends                 |
|    |                                                                                                                                                              | 13  | Neighbors               |
|    |                                                                                                                                                              | 14  | House girl or house boy |
|    |                                                                                                                                                              | 15  | Co-wife                 |
|    |                                                                                                                                                              | 16  | Others/specify ( )      |
|    |                                                                                                                                                              | 17  | Nobody                  |
| Q4 | Did health staff advised you to deliver at health facility during (any of) your Antenatal care (ANC) visit(s) of your last pregnancy?                        | Yes | No                      |
| Q5 | Did somebody apart from health staff advised you to deliver at health facility?                                                                              | Yes | No                      |
| Q6 | If “Yes” in Q5, who advised you?                                                                                                                             | 1   | Husband                 |
|    |                                                                                                                                                              | 2   | Mother-in-law           |
|    |                                                                                                                                                              | 3   | Mother                  |
|    |                                                                                                                                                              | 4   | Father-in-law           |
|    |                                                                                                                                                              | 5   | Father                  |
|    |                                                                                                                                                              | 6   | Sister-in-law           |
|    |                                                                                                                                                              | 7   | Sister                  |
|    |                                                                                                                                                              | 8   | Female relative         |
|    |                                                                                                                                                              | 9   | Children                |
|    |                                                                                                                                                              | 10  | Friends                 |

|  |  |    |                         |
|--|--|----|-------------------------|
|  |  | 11 | Neighbors               |
|  |  | 12 | House girl or house boy |
|  |  | 13 | Co-wife                 |
|  |  | 14 | Others/specify ( )      |
